# Supplementary material for: Jumonji domain-containing protein 1A promotes cell growth and progression via transactivation of c-Myc expression and predicts a poor prognosis in cervical cancer
Source: PubMed Central journal article supplement (PMC5356725; doi:10.18632/oncotarget.13208), 2016-11-08
Supplement: oncotarget-07-85151-s001.pdf [file oncotarget-07-85151-s001.pdf]

## Jumonji domain-containing protein 1A promotes cell growth and progression via transactivation of c-Myc expression and predicts a poor prognosis in cervical cancer

### SUPPLEMENTARY FIGURE

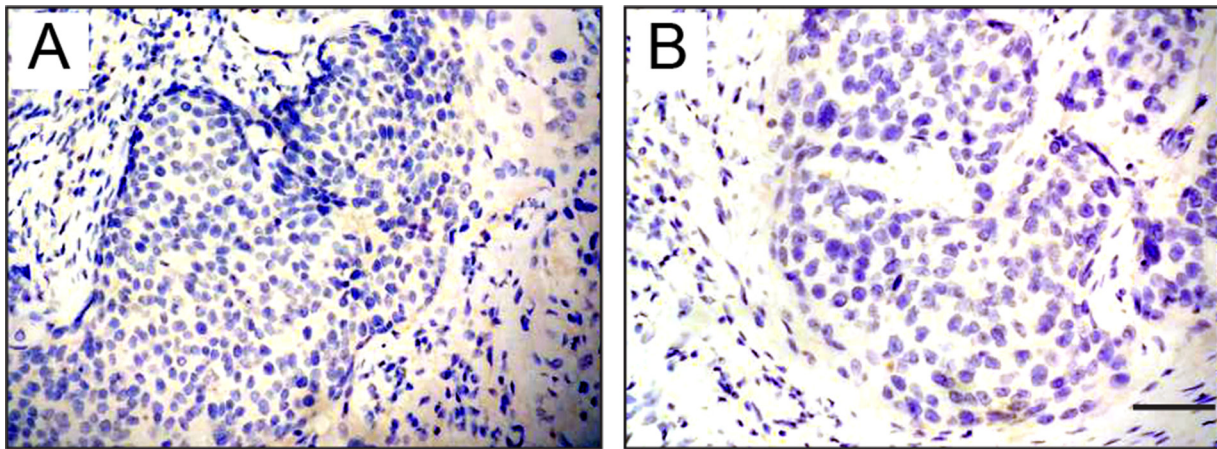

Supplementary Figure S1: Immunohistochemical staining of negative control for JMJD1A A. and c-Myc B. in cervical cancer tissues. Scale bar, 50  $\mu$ m.
